# Supplementary material
Source: PubMed Central journal article supplement (PMC5655050)
Supplement: AAC.01022-17_zac011176625s1.pdf [file AAC.01022-17_zac011176625s1.pdf]

**Supplementary Material (Table 1).** Minimum inhibitory concentrations of cefiderocol against a collection of 95 *P. aeruginosa*, *A. baumannii*, and Enterobacteriaceae isolates. Isolates are arranged in an ascending order according to cefiderocol MIC.

| Isolate  | Cefiderocol MIC (µg/mL) | Isolate | Cefiderocol MIC (µg/mL) |
|----------|-------------------------|----------|-------------------------|----------|-------------------------|----------|-------------------------|---------|-------------------------|
| EC 457   | 0.12                    | AB 138   | 0.5                     | AB 147   | 2                       | KP 537   | 4                       | AB 86   | 16                      |
| AB 90    | 0.12                    | PSA 1569 | 0.5                     | EC 456   | 2                       | KP 541   | 4                       | EC 454  | 16                      |
| AB 154   | 0.12                    | PSA 1567 | 0.5                     | AB 143   | 2                       | AB 87    | 4                       | AB 106  | 16                      |
| AB 155   | 0.12                    | AB 135   | 0.5                     | KP 530   | 2                       | KP 545   | 4                       | AB 84   | 16                      |
| KP 525   | 0.25                    | PSA 1568 | 1                       | KP 542   | 2                       | KP 532   | 4                       | AB 131  | 16                      |
| EC 465   | 0.25                    | AB 139   | 1                       | EC 466   | 2                       | KP 539   | 4                       | AB 125  | 16                      |
| PSA 1564 | 0.25                    | PSA 1570 | 1                       | EC 453   | 2                       | PSA 1595 | 4                       | AB 118  | 32                      |
| PSA 1573 | 0.25                    | AB 141   | 1                       | PSA 1574 | 2                       | PSA 1596 | 4                       | AB 120  | 32                      |
| AB 127   | 0.25                    | PSA 1571 | 1                       | PSA 1572 | 2                       | PSA 1597 | 4                       | KP 526  | 32                      |
| AB 134   | 0.25                    | EC 458   | 1                       | AB 146   | 2                       | PSA 1598 | 4                       | AB 100  | 32                      |
| KP 528   | 0.5                     | KP 529   | 1                       | KP 519   | 4                       | AB 97    | 8                       | AB 83   | 64                      |
| AB 148   | 0.5                     | PSA 1563 | 1                       | KP 531   | 4                       | AB 153   | 8                       | AB 133  | 64                      |
| AB 145   | 0.5                     | EC 460   | 1                       | KP 522   | 4                       | KP 534   | 8                       | KP 550  | 64                      |
| EC 463   | 0.5                     | PSA 1562 | 1                       | KP 520   | 4                       | PSA 1588 | 8                       | AB 132  | 64                      |
| PSA 1559 | 0.5                     | PSA 1566 | 1                       | KP 533   | 4                       | AB 126   | 8                       | EC 459  | >64                     |
| KP 524   | 0.5                     | PSA 1561 | 1                       | KP 536   | 4                       | KP 543   | 8                       | AB 99   | 128                     |
| PSA 1560 | 0.5                     | EC 461   | 1                       | KP 523   | 4                       | KP 544   | 16                      | AB 130  | 128                     |
| KP 527   | 0.5                     | EC 462   | 1                       | EC 455   | 4                       | KP 549   | 16                      | AB 129  | >256                    |
| PSA 1565 | 0.5                     | AB 152   | 1                       | KP 538   | 4                       | AB 96    | 16                      | AB 128  | >256                    |

MIC, minimum inhibitory concentration; EC, *E. coli*; KP, *K. pneumoniae*; PSA, *P. aeruginosa*; AB, *A. baumannii*
